# Supplementary material for: Prevalence and Characterization of Coagulase Positive Staphylococci from Food Products and Human Specimens in Egypt
Source: Antibiotics (Basel). 2021 Jan 14;10(1):75. doi: 10.3390/antibiotics10010075 (PMC7829985; doi:10.3390/antibiotics10010075)
Supplement: Supplementary file 1 [file antibiotics-10-00075-s001.pdf]

## Supplementary materials

**Supplementary Table S1.** Multi-drug resistant *S. aureus* strains from food and human samples.

| Resistant isolates                                                                            |       | Resistance profile                              | Antibiotics classes                                                                                              | No. of resistance antimicrobial classes |
|-----------------------------------------------------------------------------------------------|-------|-------------------------------------------------|------------------------------------------------------------------------------------------------------------------|-----------------------------------------|
| Nº                                                                                            | %     |                                                 |                                                                                                                  |                                         |
| 2                                                                                             | 4.17  | P, AX, VA, FOX, CE, CN, E, TE, CIP, NOR, SXT, C | $\beta$ -lactams, Aminoglycosides, Glycopeptides, Tetracyclines, Fluoroquinolones, Sulfonamides, Chloramphenicol | 8                                       |
| 2                                                                                             | 4.17  | P, AX, FOX, CE, CN, E, TE, NOR, SXT, C          | $\beta$ -lactams, Aminoglycosides, Macrolides, Tetracyclines, Fluoroquinolones, Sulfonamides, Chloramphenicol    | 7                                       |
| 4                                                                                             | 8.33  | P, AX, FOX, CE, CN, TE, CIP, NOR, SXT, C        | $\beta$ -lactams, Aminoglycosides, Tetracyclines, Fluoroquinolones, Sulfonamides, Chloramphenicol                | 6                                       |
| 16                                                                                            | 33.33 | P, AX, FOX, CE, CN, E, TE, SXT                  | $\beta$ -lactams, Aminoglycosides, Macrolides, Tetracyclines, Sulfonamides                                       | 5                                       |
| 11                                                                                            | 17.7  | P, AX, VA, FOX, CE, CN, TE                      | $\beta$ -lactams, Glycopeptides, Aminoglycosides, Tetracyclines                                                  | 4                                       |
| 13                                                                                            | 27.08 | P, AX, FOX, CE, CN, CIP                         | $\beta$ -lactams, Aminoglycosides, Fluoroquinolones                                                              | 3                                       |
| % estimated according to the number of tested isolates for antibiotic sensitivity test (n=70) |       |                                                 |                                                                                                                  |                                         |

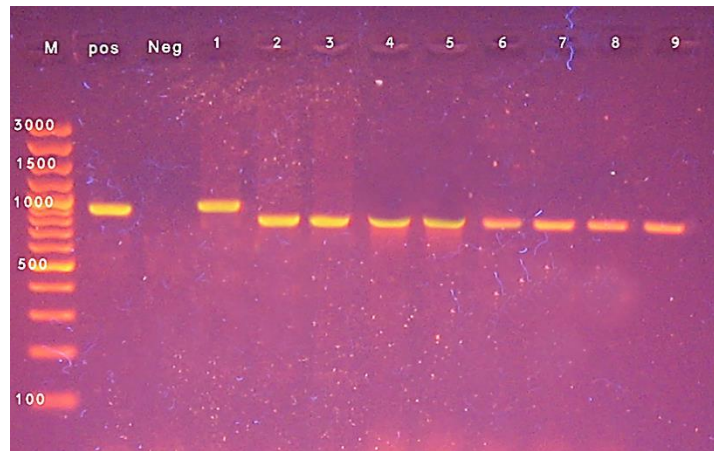

**Supplementary Figure S1.** Figure S1. Amplification of the *coa* gene of *Staphylococcus aureus* at 600–1000 bp: Lane M: 100 bp DNA ladder. Pos.: Positive control. Neg.: Negative control. Samples 1 and 2 from minced meat, 3 and 4 from beef luncheon, 5 and 6 from Karish cheese, and 7, 8, and 9 from human were recorded as positive samples for the *coa* gene.

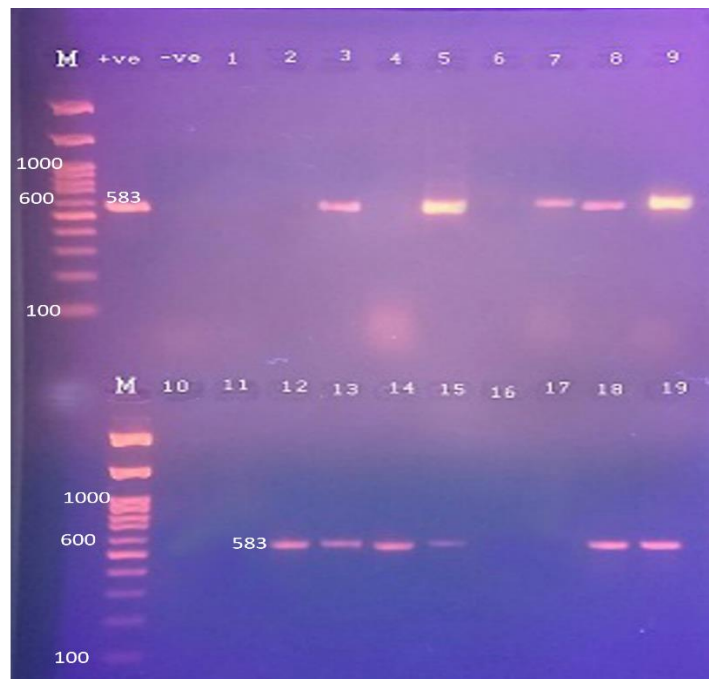

**Supplementary Figure S2.** Amplification of the 583 bp fragment of the *mecA* gene of *Staphylococcus aureus*; Lane M: 100 bp DNA ladder. Pos.: Positive control. Neg.: Negative control; Lane: Samples 3 and 5 from minced meat; 7 and 8 from beef luncheon; 9 and 12 from Karish cheese; 13, 14, 15, 18, and 19 from human samples were recorded as positive samples for the *mecA* gene.
